# Supplementary material
Source: MDPI journal article supplement (https://www.mdpi.com/2304-6740/5/3/59)

# checkCIF/PLATON report

Structure factors have been supplied for datablock(s) kv883

THIS REPORT IS FOR GUIDANCE ONLY. IF USED AS PART OF A REVIEW PROCEDURE FOR PUBLICATION, IT SHOULD NOT REPLACE THE EXPERTISE OF AN EXPERIENCED CRYSTALLOGRAPHIC REFEREE.

No syntax errors found.      CIF dictionary      Interpreting this report

## Datablock: kv883

---

Bond precision:    C-C = 0.0063 Å

Wavelength=0.71073

Cell:                a=14.2002(9)                b=15.7993(9)                c=18.0470(11)  
                      alpha=84.638(3)        beta=82.694(4)        gamma=65.057(3)  
Temperature:        200 K

|                | Calculated                                     | Reported                                       |
|----------------|------------------------------------------------|------------------------------------------------|
| Volume         | 3637.9(4)                                      | 3637.9(4)                                      |
| Space group    | P -1                                           | P -1                                           |
| Hall group     | -P 1                                           | -P 1                                           |
| Moiety formula | 2(C18 H22 Mn N2 O6), C24 H20 P, C7 N7 Re, 6(O) | C7 N7 Re, 2(C18 H22 Mn N2 O6), C24 H20 P, 6(O) |
| Sum formula    | C67 H64 Mn2 N11 O18 P Re                       | C67 H64 Mn2 N11 O18 P Re                       |
| Mr             | 1638.35                                        | 1638.34                                        |
| Dx,g cm-3      | 1.496                                          | 1.496                                          |
| Z              | 2                                              | 2                                              |
| Mu (mm-1)      | 2.098                                          | 2.098                                          |
| F000           | 1654.0                                         | 1654.0                                         |
| F000'          | 1654.19                                        |                                                |
| h,k,lmax       | 19,21,24                                       | 19,21,24                                       |
| Nref           | 19133                                          | 18851                                          |
| Tmin,Tmax      | 0.692,0.761                                    | 0.553,0.746                                    |
| Tmin'          | 0.528                                          |                                                |

Correction method= # Reported T Limits: Tmin=0.553 Tmax=0.746

AbsCorr = MULTI-SCAN

Data completeness= 0.985

Theta(max)= 28.881

R(reflections)= 0.0394( 16297)

wR2(reflections)= 0.0978( 18851)

S = 1.120

Npar= 909

---

The following ALERTS were generated. Each ALERT has the format  
**test-name\_ALERT\_alert-type\_alert-level**.  
Click on the hyperlinks for more details of the test.

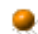

#### Alert level B

PLAT306\_ALERT\_2\_B Isolated Oxygen Atom (H-atoms Missing ?) ..... O1S Check

**Author Response:** These oxygen atoms are those of solvent water molecules. Hydrogen atoms were not localized because of their disorder. For instance, the distances between equivalent pairs O1S - O1S' and O4S - O4S' are short enough (of ca. 2.85 Ang.) to reveal hydrogen bond; however, due to the presence of inversion center, it is not possible to place H atom with full occupancy between these oxygens.

PLAT306\_ALERT\_2\_B Isolated Oxygen Atom (H-atoms Missing ?) ..... O2S Check

**Author Response:** These oxygen atoms are those of solvent water molecules. Hydrogen atoms were not localized because of their disorder. For instance, the distances between equivalent pairs O1S - O1S' and O4S - O4S' are short enough (of ca. 2.85 Ang.) to reveal hydrogen bond; however, due to the presence of inversion center, it is not possible to place H atom with full occupancy between these oxygens.

PLAT306\_ALERT\_2\_B Isolated Oxygen Atom (H-atoms Missing ?) ..... O3S Check

**Author Response:** These oxygen atoms are those of solvent water molecules. Hydrogen atoms were not localized because of their disorder. For instance, the distances between equivalent pairs O1S - O1S' and O4S - O4S' are short enough (of ca. 2.85 Ang.) to reveal hydrogen bond; however, due to the presence of inversion center, it is not possible to place H atom with full occupancy between these oxygens.

PLAT306\_ALERT\_2\_B Isolated Oxygen Atom (H-atoms Missing ?) ..... O4S Check

**Author Response:** These oxygen atoms are those of solvent water molecules. Hydrogen atoms were not localized because of their disorder. For instance, the distances between equivalent pairs O1S - O1S' and O4S - O4S' are short enough (of ca. 2.85 Ang.) to reveal hydrogen bond; however, due to the presence of inversion center, it is not possible to place H atom with full occupancy between these oxygens.

PLAT306\_ALERT\_2\_B Isolated Oxygen Atom (H-atoms Missing ?) ..... O5S Check

**Author Response:** These oxygen atoms are those of solvent water molecules. Hydrogen atoms were not localized because of their disorder. For instance, the distances between equivalent pairs O1S - O1S' and O4S - O4S' are short enough (of ca. 2.85 Ang.) to reveal hydrogen bond; however, due to the presence of inversion center, it is not possible to place H atom with full occupancy between these oxygens.

PLAT306\_ALERT\_2\_B Isolated Oxygen Atom (H-atoms Missing ?) ..... O6S Check

**Author Response:** These oxygen atoms are those of solvent water molecules. Hydrogen atoms were not localized because of their disorder. For instance, the distances between equivalent pairs O1S - O1S' and O4S - O4S' are short enough (of ca. 2.85 Ang.) to reveal hydrogen bond; however, due to the presence of inversion center, it is not possible to place H atom with full occupancy between these oxygens.

PLAT430\_ALERT\_2\_B Short Inter D...A Contact O1S .. O2S .. 2.81 Ang.

**Author Response:** These oxygen atoms are those of solvent water molecules. Hydrogen atoms were not localized because of their disorder. For instance, the distances between equivalent pairs O1S - O1S' and O4S - O4S' are short enough (of ca. 2.85 Ang.) to reveal hydrogen bond; however, due to the presence of inversion center, it is not possible to place H atom with full occupancy between these oxygens.

PLAT430\_ALERT\_2\_B Short Inter D...A Contact O1S .. O1S .. 2.82 Ang.

**Author Response:** These oxygen atoms are those of solvent water molecules. Hydrogen atoms were not localized because of their disorder. For instance, the distances between equivalent pairs O1S - O1S' and O4S - O4S' are short enough (of ca. 2.85 Ang.) to reveal hydrogen bond; however, due to the presence of inversion center, it is not possible to place H atom with full occupancy between these oxygens.

PLAT430\_ALERT\_2\_B Short Inter D...A Contact O1S .. O6S .. 2.83 Ang.

**Author Response:** These oxygen atoms are those of solvent water molecules. Hydrogen atoms were not localized because of their disorder. For instance, the distances between equivalent pairs O1S - O1S' and O4S - O4S' are short enough (of ca. 2.85 Ang.) to reveal hydrogen bond; however, due to the presence of inversion center, it is not possible to place H atom with full occupancy between these oxygens.

PLAT430\_ALERT\_2\_B Short Inter D...A Contact O2S .. N35 .. 2.86 Ang.

**Author Response:** These oxygen atoms are those of solvent water molecules. Hydrogen atoms were not localized because of their disorder. For instance, the distances between equivalent pairs O1S - O1S' and O4S - O4S' are short enough (of ca. 2.85 Ang.) to reveal hydrogen bond; however, due to the presence of inversion center, it is not possible to place H atom with full occupancy between these oxygens.

PLAT430\_ALERT\_2\_B Short Inter D...A Contact O3S .. O6S .. 2.79 Ang.

**Author Response:** These oxygen atoms are those of solvent water molecules. Hydrogen atoms were not localized because of their disorder. For instance, the distances between equivalent pairs O1S - O1S' and O4S - O4S' are short enough (of ca. 2.85 Ang.) to reveal hydrogen bond; however, due to the presence of inversion center, it is not possible to place H atom with full occupancy between these oxygens.

PLAT430\_ALERT\_2\_B Short Inter D...A Contact O3S .. N34 .. 2.85 Ang.

**Author Response:** These oxygen atoms are those of solvent water molecules. Hydrogen atoms were not localized because of their disorder. For instance, the distances between equivalent pairs O1S - O1S' and O4S - O4S' are short enough (of ca. 2.85 Ang.) to reveal hydrogen bond; however, due to the presence of inversion center, it is not possible to place H atom with full occupancy between these oxygens.

PLAT430\_ALERT\_2\_B Short Inter D...A Contact O4S .. O5S .. 2.80 Ang.

**Author Response:** These oxygen atoms are those of solvent water molecules. Hydrogen atoms were not localized because of their disorder. For instance, the distances between equivalent pairs O1S - O1S' and O4S - O4S' are short enough (of ca. 2.85 Ang.) to reveal hydrogen bond; however, due to the presence of inversion center, it is not possible to place H atom with full occupancy between these oxygens.

PLAT430\_ALERT\_2\_B Short Inter D...A Contact O4S .. O6S .. 2.82 Ang.

**Author Response:** These oxygen atoms are those of solvent water molecules. Hydrogen atoms were not localized because of their disorder. For instance, the distances between equivalent pairs O1S - O1S' and O4S - O4S' are short enough (of ca. 2.85 Ang.) to reveal hydrogen bond; however, due to the presence of inversion center, it is not possible to place H atom with full occupancy between these oxygens.

PLAT430\_ALERT\_2\_B Short Inter D...A Contact O4S .. O4S .. 2.84 Ang.

**Author Response:** These oxygen atoms are those of solvent water molecules. Hydrogen atoms were not localized because of their disorder. For instance, the distances between equivalent pairs O1S - O1S' and O4S - O4S' are short enough (of ca. 2.85 Ang.) to reveal hydrogen bond; however, due to the presence of inversion center, it is not possible to place H atom with full occupancy between these oxygens.

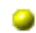

#### Alert level C

|                   |                                                  |       |        |
|-------------------|--------------------------------------------------|-------|--------|
| PLAT094_ALERT_2_C | Ratio of Maximum / Minimum Residual Density .... | 2.78  | Report |
| PLAT241_ALERT_2_C | High 'MainMol' Ueq as Compared to Neighbors of   | C45   | Check  |
| PLAT601_ALERT_2_C | Structure Contains Solvent Accessible VOIDS of . | 44    | Ang3   |
| PLAT790_ALERT_4_C | Centre of Gravity not Within Unit Cell: Resd. #  | 1     | Note   |
|                   | C18 H22 Mn N2 O6                                 |       |        |
| PLAT906_ALERT_3_C | Large K value in the Analysis of Variance .....  | 2.009 | Check  |
| PLAT911_ALERT_3_C | Missing # FCF Refl Between THmin & STh/L= 0.600  | 68    | Report |
| PLAT971_ALERT_2_C | Check Calcd Residual Density 2.16A From C114     | 1.98  | eA-3   |
| PLAT971_ALERT_2_C | Check Calcd Residual Density 0.84A From Rel      | 1.85  | eA-3   |
| PLAT971_ALERT_2_C | Check Calcd Residual Density 0.84A From Rel      | 1.70  | eA-3   |
| PLAT975_ALERT_2_C | Check Calcd Residual Density 0.93A From O2S      | 0.79  | eA-3   |
| PLAT975_ALERT_2_C | Check Calcd Residual Density 1.07A From O6S      | 0.64  | eA-3   |
| PLAT976_ALERT_2_C | Check Calcd Residual Density 0.41A From O6S      | -0.49 | eA-3   |
| PLAT976_ALERT_2_C | Check Calcd Residual Density 0.51A From O6S      | -0.43 | eA-3   |

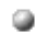

#### Alert level G

|                   |                                                  |      |              |
|-------------------|--------------------------------------------------|------|--------------|
| PLAT007_ALERT_5_G | Number of Unrefined Donor-H Atoms .....          | 8    | Report       |
| PLAT012_ALERT_1_G | No _shelx_res_checksum found in CIF .....        |      | Please Check |
| PLAT042_ALERT_1_G | Calc. and Reported MoietyFormula Strings Differ  |      | Please Check |
| PLAT083_ALERT_2_G | SHELXL Second Parameter in WGHT Unusually Large  | 7.99 | Why ?        |
| PLAT232_ALERT_2_G | Hirshfeld Test Diff (M-X) Rel -- C37 ..          | 5.2  | s.u.         |
| PLAT790_ALERT_4_G | Centre of Gravity not Within Unit Cell: Resd. #  | 2    | Note         |
|                   | C18 H22 Mn N2 O6                                 |      |              |
| PLAT790_ALERT_4_G | Centre of Gravity not Within Unit Cell: Resd. #  | 5    | Note         |
|                   | O                                                |      |              |
| PLAT790_ALERT_4_G | Centre of Gravity not Within Unit Cell: Resd. #  | 6    | Note         |
|                   | O                                                |      |              |
| PLAT790_ALERT_4_G | Centre of Gravity not Within Unit Cell: Resd. #  | 7    | Note         |
|                   | O                                                |      |              |
| PLAT790_ALERT_4_G | Centre of Gravity not Within Unit Cell: Resd. #  | 10   | Note         |
|                   | O                                                |      |              |
| PLAT910_ALERT_3_G | Missing # of FCF Reflection(s) Below Theta(Min)  | 2    | Note         |
| PLAT912_ALERT_4_G | Missing # of FCF Reflections Above STh/L= 0.600  | 212  | Note         |
| PLAT933_ALERT_2_G | Number of OMIT Records in Embedded .res File ... | 7    | Note         |
| PLAT978_ALERT_2_G | Number C-C Bonds with Positive Residual Density. | 1    | Note         |

- 0 **ALERT level A** = Most likely a serious problem - resolve or explain  
15 **ALERT level B** = A potentially serious problem, consider carefully  
13 **ALERT level C** = Check. Ensure it is not caused by an omission or oversight  
14 **ALERT level G** = General information/check it is not something unexpected
- 2 **ALERT type 1** CIF construction/syntax error, inconsistent or missing data  
29 **ALERT type 2** Indicator that the structure model may be wrong or deficient  
3 **ALERT type 3** Indicator that the structure quality may be low  
7 **ALERT type 4** Improvement, methodology, query or suggestion  
1 **ALERT type 5** Informative message, check

---

It is advisable to attempt to resolve as many as possible of the alerts in all categories. Often the minor alerts point to easily fixed oversights, errors and omissions in your CIF or refinement strategy, so attention to these fine details can be worthwhile. In order to resolve some of the more serious problems it may be necessary to carry out additional measurements or structure refinements. However, the purpose of your study may justify the reported deviations and the more serious of these should normally be commented upon in the discussion or experimental section of a paper or in the "special\_details" fields of the CIF. checkCIF was carefully designed to identify outliers and unusual parameters, but every test has its limitations and alerts that are not important in a particular case may appear. Conversely, the absence of alerts does not guarantee there are no aspects of the results needing attention. It is up to the individual to critically assess their own results and, if necessary, seek expert advice.

### **Publication of your CIF in IUCr journals**

A basic structural check has been run on your CIF. These basic checks will be run on all CIFs submitted for publication in IUCr journals (*Acta Crystallographica*, *Journal of Applied Crystallography*, *Journal of Synchrotron Radiation*); however, if you intend to submit to *Acta Crystallographica Section C* or *E* or *IUCrData*, you should make sure that full publication checks are run on the final version of your CIF prior to submission.

### **Publication of your CIF in other journals**

Please refer to the *Notes for Authors* of the relevant journal for any special instructions relating to CIF submission.

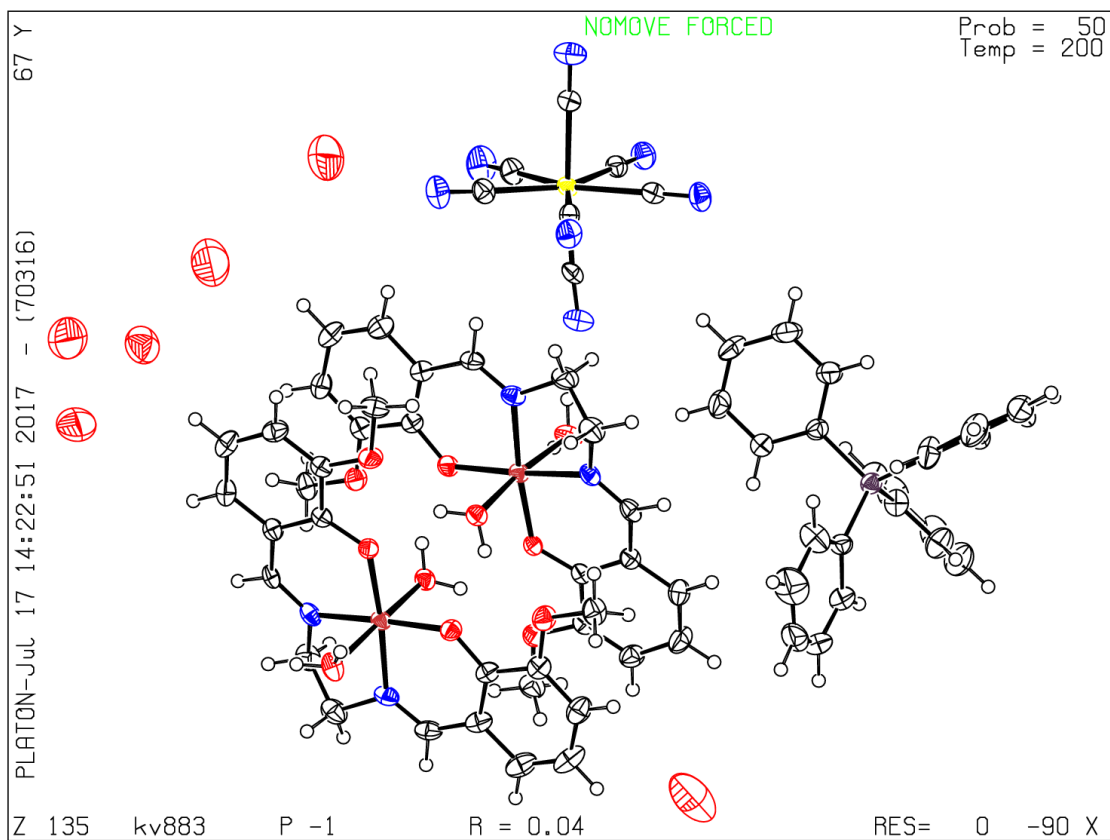

Supplement: s1 [file s1]
