# Supplementary material
Source: MDPI journal article supplement (https://www.mdpi.com/2304-6740/5/3/59)

# checkCIF/PLATON report

Structure factors have been supplied for datablock(s) kv908

THIS REPORT IS FOR GUIDANCE ONLY. IF USED AS PART OF A REVIEW PROCEDURE FOR PUBLICATION, IT SHOULD NOT REPLACE THE EXPERTISE OF AN EXPERIENCED CRYSTALLOGRAPHIC REFEREE.

No syntax errors found.      CIF dictionary      Interpreting this report

## Datablock: kv908

---

|                 |                                                                 |                                                              |
|-----------------|-----------------------------------------------------------------|--------------------------------------------------------------|
| Bond precision: | C-C = 0.0062 A                                                  | Wavelength=0.71073                                           |
| Cell:           | a=15.9891(18)                                                   | b=27.544(3)      c=21.779(2)                                 |
|                 | alpha=90                                                        | beta=108.762(4)      gamma=90                                |
| Temperature:    | 200 K                                                           |                                                              |
|                 | Calculated                                                      | Reported                                                     |
| Volume          | 9081.9(17)                                                      | 9081.7(17)                                                   |
| Space group     | P 21/c                                                          | P 1 21/c 1                                                   |
| Hall group      | -P 2ybc                                                         | -P 2ybc                                                      |
| Moiety formula  | 4(C20 H23 Mn N3 O5), 4(C18 H22 Mn N2 O6), 8(C24 H20 B), 19(C2 H | C20 H23 Mn N3 O5, C18 H22 Mn N2 O6, 5(C2 H3 N), 2(C24 H20 B) |
| Sum formula     | C384 H400 B8 Mn8 N40 O44                                        | C96 H100 B2 Mn2 N10 O11                                      |
| Mr              | 6805.44                                                         | 1701.35                                                      |
| Dx, g cm-3      | 1.244                                                           | 1.244                                                        |
| Z               | 1                                                               | 4                                                            |
| Mu (mm-1)       | 0.342                                                           | 0.342                                                        |
| F000            | 3576.0                                                          | 3576.0                                                       |
| F000'           | 3580.05                                                         |                                                              |
| h,k,lmax        | 19,32,25                                                        | 19,32,25                                                     |
| Nref            | 16022                                                           | 16018                                                        |
| Tmin,Tmax       | 0.968,0.973                                                     | 0.699,0.745                                                  |
| Tmin'           | 0.893                                                           |                                                              |

Correction method= # Reported T Limits: Tmin=0.699 Tmax=0.745  
AbsCorr = MULTI-SCAN

Data completeness= 1.000      Theta(max)= 25.027

R(reflections)= 0.0563( 9349)      wR2(reflections)= 0.1556( 16018)

S = 1.021      Npar= 1143

---

The following ALERTS were generated. Each ALERT has the format

**test-name\_ALERT\_alert-type\_alert-level.**

Click on the hyperlinks for more details of the test.

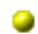

### Alert level C

|                   |                                                  |         |        |
|-------------------|--------------------------------------------------|---------|--------|
| PLAT094_ALERT_2_C | Ratio of Maximum / Minimum Residual Density .... | 2.10    | Report |
| PLAT230_ALERT_2_C | Hirshfeld Test Diff for C217 -- C218 ..          | 6.5     | s.u.   |
| PLAT241_ALERT_2_C | High 'MainMol' Ueq as Compared to Neighbors of   | N13     | Check  |
| PLAT241_ALERT_2_C | High 'MainMol' Ueq as Compared to Neighbors of   | C217    | Check  |
| PLAT242_ALERT_2_C | Low 'MainMol' Ueq as Compared to Neighbors of    | C130    | Check  |
| PLAT244_ALERT_4_C | Low 'Solvent' Ueq as Compared to Neighbors of    | C12S    | Check  |
| PLAT244_ALERT_4_C | Low 'Solvent' Ueq as Compared to Neighbors of    | C22S    | Check  |
| PLAT244_ALERT_4_C | Low 'Solvent' Ueq as Compared to Neighbors of    | C32S    | Check  |
| PLAT244_ALERT_4_C | Low 'Solvent' Ueq as Compared to Neighbors of    | C42S    | Check  |
| PLAT341_ALERT_3_C | Low Bond Precision on C-C Bonds .....            | 0.00624 | Ang.   |
| PLAT360_ALERT_2_C | Short C(sp3)-C(sp3) Bond C217 - C218 ..          | 1.43    | Ang.   |
| PLAT911_ALERT_3_C | Missing # FCF Refl Between THmin & STh/L= 0.595  | 4       | Report |

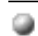

### Alert level G

|                   |                                                  |        |        |
|-------------------|--------------------------------------------------|--------|--------|
| PLAT002_ALERT_2_G | Number of Distance or Angle Restraints on AtSite | 9      | Note   |
| PLAT003_ALERT_2_G | Number of Uiso or Uij Restrained non-H Atoms ... | 4      | Report |
| PLAT007_ALERT_5_G | Number of Unrefined Donor-H Atoms .....          | 6      | Report |
| PLAT012_ALERT_1_G | No _shelx_res_checksum found in CIF .....        | Please | Check  |
| PLAT042_ALERT_1_G | Calc. and Reported MoietyFormula Strings Differ  | Please | Check  |
| PLAT045_ALERT_1_G | Calculated and Reported Z Differ by a Factor ... | 0.25   | Check  |
| PLAT171_ALERT_4_G | The CIF-Embedded .res File Contains EADP Records | 1      | Report |
| PLAT172_ALERT_4_G | The CIF-Embedded .res File Contains DFIX Records | 4      | Report |
| PLAT173_ALERT_4_G | The CIF-Embedded .res File Contains DANG Records | 3      | Report |
| PLAT177_ALERT_4_G | The CIF-Embedded .res File Contains DELU Records | 1      | Report |
| PLAT230_ALERT_2_G | Hirshfeld Test Diff for N13 -- C130 ..           | 5.5    | s.u.   |
| PLAT300_ALERT_4_G | Atom Site Occupancy of N71S is Constrained at    | 0.5    | Check  |
| PLAT300_ALERT_4_G | Atom Site Occupancy of C72S is Constrained at    | 0.5    | Check  |
| PLAT300_ALERT_4_G | Atom Site Occupancy of C73S is Constrained at    | 0.5    | Check  |
| PLAT300_ALERT_4_G | Atom Site Occupancy of H73A is Constrained at    | 0.5    | Check  |
| PLAT300_ALERT_4_G | Atom Site Occupancy of H73B is Constrained at    | 0.5    | Check  |
| PLAT300_ALERT_4_G | Atom Site Occupancy of H73C is Constrained at    | 0.5    | Check  |
| PLAT300_ALERT_4_G | Atom Site Occupancy of N51S is Constrained at    | 0.25   | Check  |
| PLAT300_ALERT_4_G | Atom Site Occupancy of C52S is Constrained at    | 0.25   | Check  |
| PLAT300_ALERT_4_G | Atom Site Occupancy of C53S is Constrained at    | 0.25   | Check  |
| PLAT300_ALERT_4_G | Atom Site Occupancy of H53A is Constrained at    | 0.25   | Check  |
| PLAT300_ALERT_4_G | Atom Site Occupancy of H53B is Constrained at    | 0.25   | Check  |
| PLAT300_ALERT_4_G | Atom Site Occupancy of H53C is Constrained at    | 0.25   | Check  |
| PLAT300_ALERT_4_G | Atom Site Occupancy of N61S is Constrained at    | 0.25   | Check  |
| PLAT300_ALERT_4_G | Atom Site Occupancy of C62S is Constrained at    | 0.25   | Check  |
| PLAT300_ALERT_4_G | Atom Site Occupancy of C63S is Constrained at    | 0.25   | Check  |
| PLAT300_ALERT_4_G | Atom Site Occupancy of H63B is Constrained at    | 0.25   | Check  |
| PLAT300_ALERT_4_G | Atom Site Occupancy of H63A is Constrained at    | 0.25   | Check  |
| PLAT300_ALERT_4_G | Atom Site Occupancy of H63C is Constrained at    | 0.25   | Check  |
| PLAT301_ALERT_3_G | Main Residue Disorder .....(Resd 1)..            | 7      | % Note |
| PLAT302_ALERT_4_G | Anion/Solvent/Minor-Residue Disorder (Resd 9)..  | 100    | % Note |
| PLAT302_ALERT_4_G | Anion/Solvent/Minor-Residue Disorder (Resd 10).. | 100    | % Note |
| PLAT302_ALERT_4_G | Anion/Solvent/Minor-Residue Disorder (Resd 11).. | 100    | % Note |
| PLAT302_ALERT_4_G | Anion/Solvent/Minor-Residue Disorder (Resd 12).. | 100    | % Note |
| PLAT302_ALERT_4_G | Anion/Solvent/Minor-Residue Disorder (Resd 13).. | 100    | % Note |
| PLAT304_ALERT_4_G | Non-Integer Number of Atoms ( 1.50) in Resd. #   | 10     | Check  |
| PLAT304_ALERT_4_G | Non-Integer Number of Atoms ( 0.25) in Resd. #   | 11     | Check  |
| PLAT304_ALERT_4_G | Non-Integer Number of Atoms ( 0.25) in Resd. #   | 12     | Check  |
| PLAT304_ALERT_4_G | Non-Integer Number of Atoms ( 0.50) in Resd. #   | 13     | Check  |
| PLAT304_ALERT_4_G | Non-Integer Number of Atoms ( 0.25) in Resd. #   | 14     | Check  |

|                                                                    |    |       |
|--------------------------------------------------------------------|----|-------|
| PLAT304_ALERT_4_G Non-Integer Number of Atoms ( 0.25) in Resd. #   | 15 | Check |
| PLAT860_ALERT_3_G Number of Least-Squares Restraints .....         | 14 | Note  |
| PLAT910_ALERT_3_G Missing # of FCF Reflection(s) Below Theta(Min)  | 2  | Note  |
| PLAT933_ALERT_2_G Number of OMIT Records in Embedded .res File ... | 1  | Note  |
| PLAT978_ALERT_2_G Number C-C Bonds with Positive Residual Density. | 2  | Note  |

---

0 **ALERT level A** = Most likely a serious problem - resolve or explain  
 0 **ALERT level B** = A potentially serious problem, consider carefully  
 12 **ALERT level C** = Check. Ensure it is not caused by an omission or oversight  
 45 **ALERT level G** = General information/check it is not something unexpected

3 ALERT type 1 CIF construction/syntax error, inconsistent or missing data  
 11 ALERT type 2 Indicator that the structure model may be wrong or deficient  
 5 ALERT type 3 Indicator that the structure quality may be low  
 37 ALERT type 4 Improvement, methodology, query or suggestion  
 1 ALERT type 5 Informative message, check

---

It is advisable to attempt to resolve as many as possible of the alerts in all categories. Often the minor alerts point to easily fixed oversights, errors and omissions in your CIF or refinement strategy, so attention to these fine details can be worthwhile. In order to resolve some of the more serious problems it may be necessary to carry out additional measurements or structure refinements. However, the purpose of your study may justify the reported deviations and the more serious of these should normally be commented upon in the discussion or experimental section of a paper or in the "special\_details" fields of the CIF. checkCIF was carefully designed to identify outliers and unusual parameters, but every test has its limitations and alerts that are not important in a particular case may appear. Conversely, the absence of alerts does not guarantee there are no aspects of the results needing attention. It is up to the individual to critically assess their own results and, if necessary, seek expert advice.

### Publication of your CIF in IUCr journals

A basic structural check has been run on your CIF. These basic checks will be run on all CIFs submitted for publication in IUCr journals (*Acta Crystallographica*, *Journal of Applied Crystallography*, *Journal of Synchrotron Radiation*); however, if you intend to submit to *Acta Crystallographica Section C* or *E* or *IUCrData*, you should make sure that full publication checks are run on the final version of your CIF prior to submission.

### Publication of your CIF in other journals

Please refer to the *Notes for Authors* of the relevant journal for any special instructions relating to CIF submission.

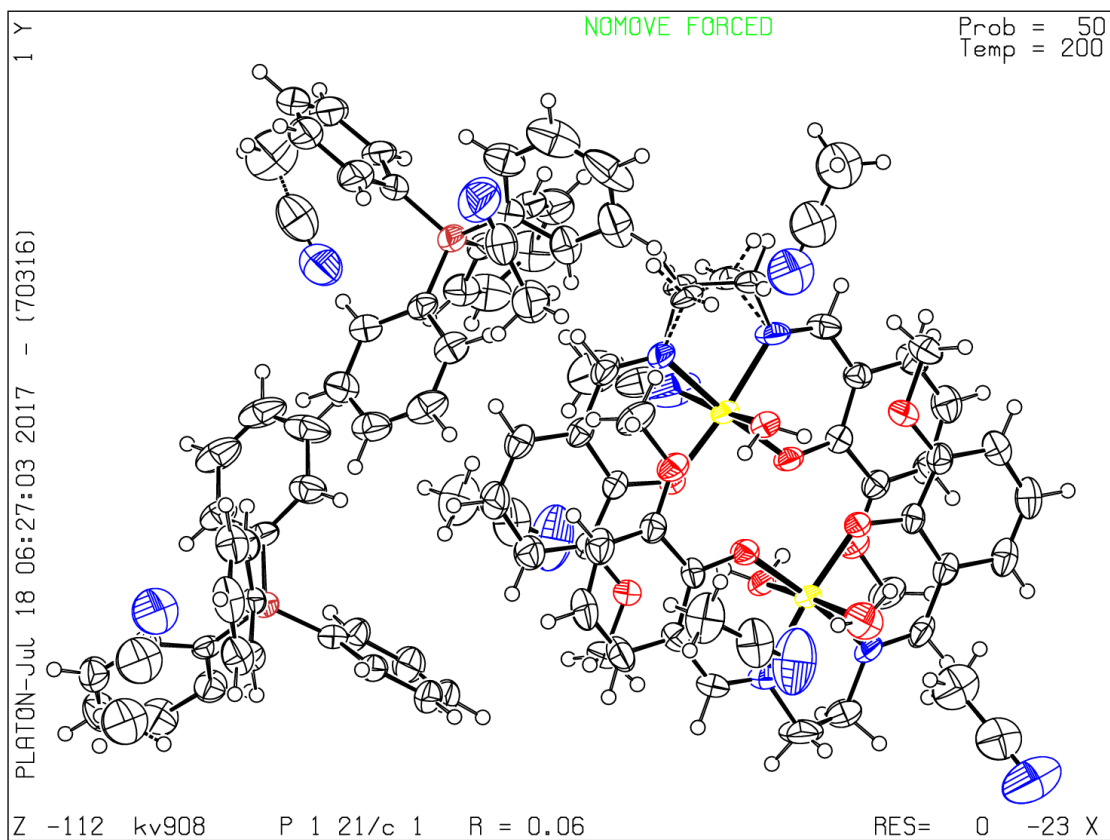

Supplement: s1 [file s1]
