# Supplementary material
Source: MDPI journal article supplement (https://www.mdpi.com/2304-6740/5/3/59)
Supplement: s1 [file s1]

# Supplementary Materials: Assembly of Mn(III) Schiff Base Complexes with Heptacyanorhenate (IV)

Taisiya S. Sukhikh and Kira E. Vostrikova

**Table S1.** Some geometric parameters related to the contacts of the adjacent [MnSB]<sup>+</sup> or [MnSB(Solv)<sub>n</sub>]<sup>+</sup> units.

| Compound                                                                                                                                                                                              | d Mn...Mn<br>Å | Mn–O <sub>Ph</sub><br>Å | d $\pi$ – $\pi$<br>Å* | $\angle$ $\pi$ – $\pi$<br>°* | shift $\pi$ – $\pi$<br>Å* |
|-------------------------------------------------------------------------------------------------------------------------------------------------------------------------------------------------------|----------------|-------------------------|-----------------------|------------------------------|---------------------------|
| [(Mn <sup>5</sup> MeSalen) <sub>2</sub> OAc]PF <sub>6</sub> , <b>2</b>                                                                                                                                | 3.38           | 2.39                    | 3.86                  | 26.4                         | 0.46                      |
|                                                                                                                                                                                                       | 3.53           | 2.81                    | 3.71                  | 11.7                         | 1.16                      |
| [Mn <sub>2</sub> (salen) <sub>2</sub> OAc]ClO <sub>4</sub> [42]                                                                                                                                       | 3.42           | 2.45                    | 3.62                  | 10.7                         | 1.02                      |
|                                                                                                                                                                                                       | 3.51           | 2.69                    | 3.78                  | 21.4                         | 0.67                      |
| [(Mn <sup>3</sup> MeOSalen) <sub>2</sub> (H <sub>2</sub> O) <sub>2</sub> ]ClO <sub>4</sub> ·H <sub>2</sub> O, <b>1</b> [20]                                                                           | 4.79           | 4.10                    | 3.76                  | 5.7                          | 1.54                      |
| Mn <sup>3</sup> MeOSalen(H <sub>2</sub> O) <sub>2</sub> [Mn <sup>3</sup> MeOSalen(H <sub>2</sub> O)MeCN]<br>(Ph <sub>4</sub> B) <sub>2</sub> ·5MeCN, <b>6</b>                                         | 4.82           | 4.18                    |                       |                              |                           |
|                                                                                                                                                                                                       | 8.25           | 8.06                    |                       |                              |                           |
| Ph <sub>4</sub> P[Mn <sup>3</sup> MeOSalen(H <sub>2</sub> O) <sub>2</sub> ] <sub>2</sub> [Re(CN) <sub>7</sub> ]·6H <sub>2</sub> O, <b>3</b>                                                           | 4.76           | 4.08                    |                       |                              |                           |
|                                                                                                                                                                                                       | 6.58           | 4.07                    |                       |                              |                           |
| [(Mn <sup>5</sup> MeSalen) <sub>6</sub> (H <sub>2</sub> O) <sub>2</sub> Re(CN) <sub>7</sub> ] <sub>2</sub> Re(CN) <sub>7</sub> ]<br>Cl <sub>2</sub> ·PF <sub>6</sub> ·H <sub>2</sub> O, <b>4</b>      | 3.67           | 2.86                    | 3.80                  | 13.4                         | 1.37                      |
|                                                                                                                                                                                                       |                | 2.78                    |                       |                              |                           |
|                                                                                                                                                                                                       | 3.44           | 2.54                    |                       |                              |                           |
|                                                                                                                                                                                                       | 5.00           | 4.34                    |                       |                              |                           |
|                                                                                                                                                                                                       |                | 4.19                    |                       |                              |                           |
| [Mn <sup>5</sup> MeSalenH <sub>2</sub> O( <i>i</i> -PrOH)][(Mn <sup>5</sup> MeSalen) <sub>5</sub><br>H <sub>2</sub> O( <i>i</i> -PrOH) <sub>2</sub> Re(CN) <sub>7</sub> ]·2PF <sub>6</sub> , <b>5</b> | 3.42           | 2.59                    | 3.75                  | 15.4                         | 1.12                      |
|                                                                                                                                                                                                       | 3.42           | 2.59                    |                       |                              |                           |
|                                                                                                                                                                                                       | 5.06           | 4.34                    | 3.88                  | 7.0                          | 1.89                      |

\*Parameters of the  $\pi$ – $\pi$  interactions were found using Olex 2 software [43].

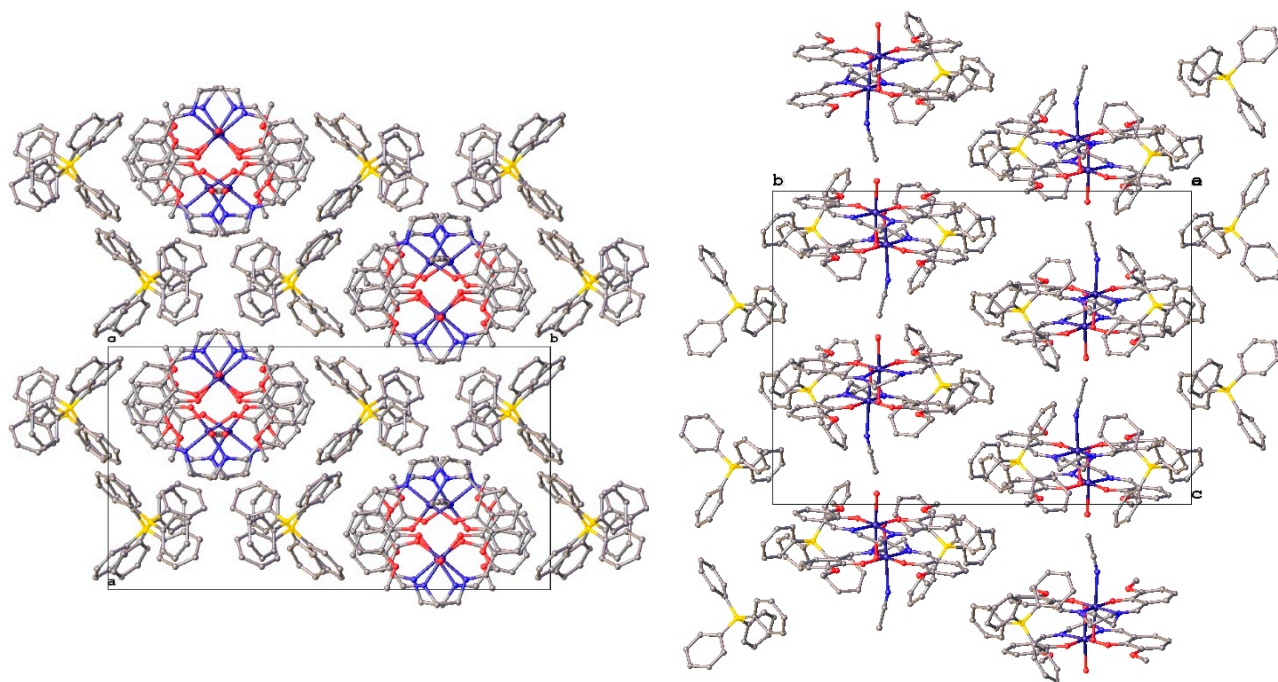

**Figure S1.** The crystal packing in the compound **6**. View along the axis *c* (left) and *a* (right). Hydrogen atoms are omitted.

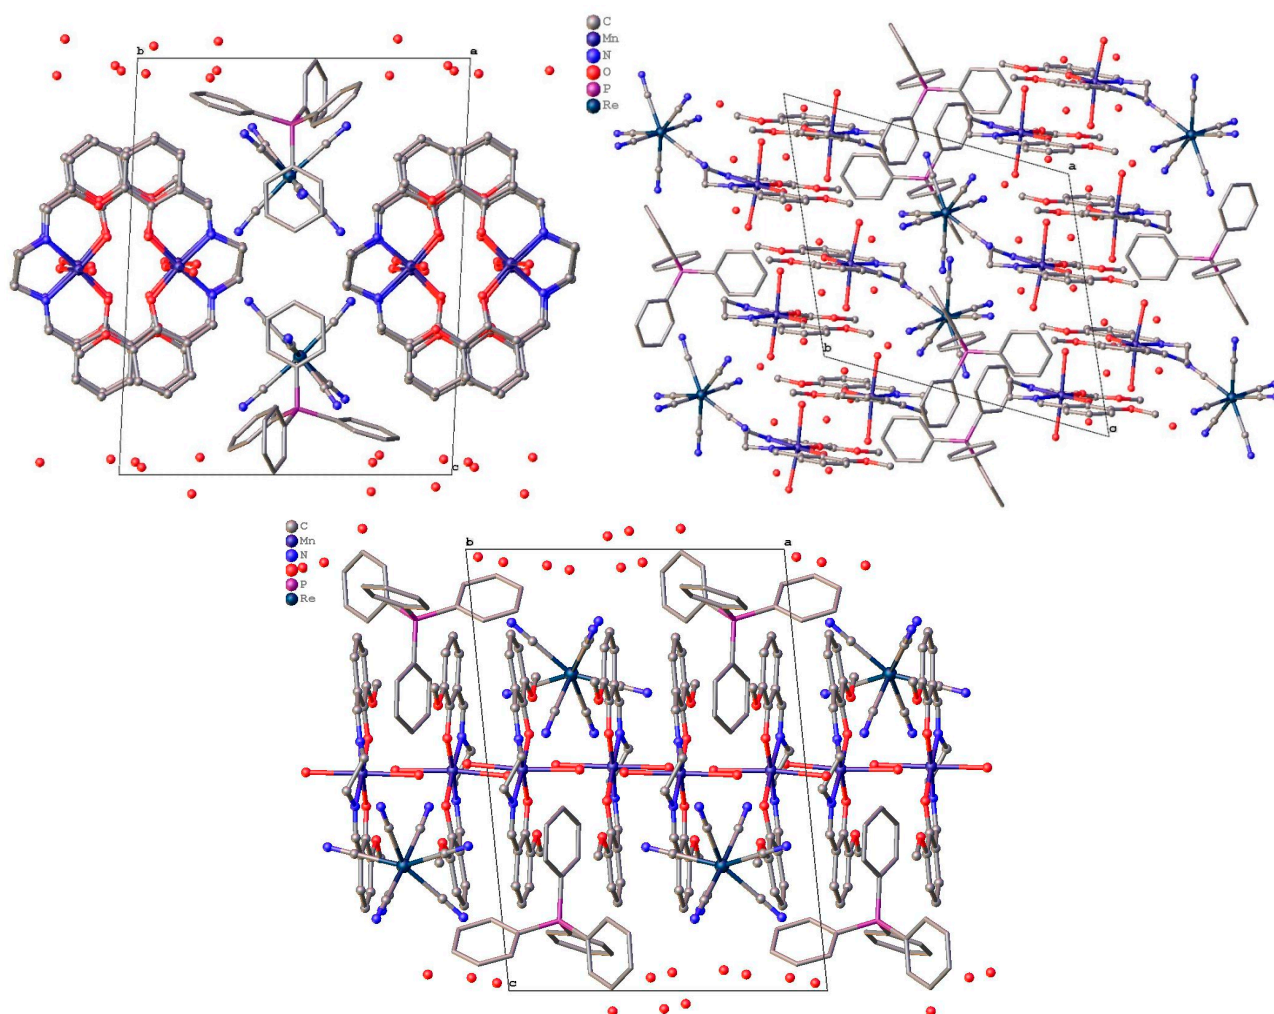

**Figure S2.** The crystal packing in the compound 6. View along the three axes. Hydrogen atoms are omitted.

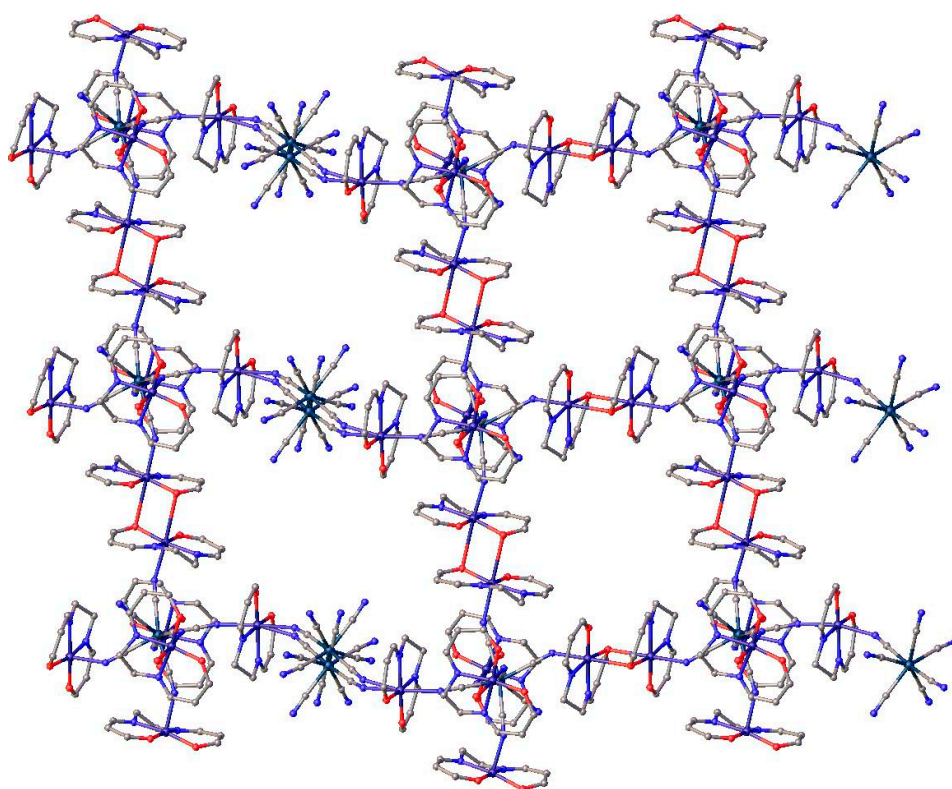

**Figure S3.** Schematic presentation of a layer in 4. SB ligand is reduced for clarity.

**Table S2.** Ideal and observed angles for the complex anion  $[\text{Re}(\text{CN})_7]^{3-}$ .

| Re polyhedron / compound | atoms to define edge 1 | atoms to define edge 2 | dihedral angle, deg |
|--------------------------|------------------------|------------------------|---------------------|
| pentagonal bipyramid     |                        |                        | 54.4; 54.4          |
| capped trigonal prism    |                        |                        | 0; 0; 41.5          |
| capped octahedron        |                        |                        | 16.2; 16.2; 16.2    |
| 4:3 piano stool          |                        |                        | 0; 0                |
| <b>3, Re1</b>            | C31—C37—C32            | C31—C37—C36            | 54.3                |
|                          | C31—C36—C34            | C31—C36—C37            | 53.5                |
|                          | C31—C34—C36            | C31—C34—C33            | 56.4                |
|                          | C31—C33—C32            | C31—C33—C34            | 47.3                |
|                          | C31—C32—C33            | C31—C32—C37            | 58.9                |
|                          | C35—C37—C32            | C35—C37—C36            | 57.2                |
|                          | C35—C36—C37            | C35—C36—C34            | 56.0                |
|                          | C35—C34—C36            | C35—C34—C33            | 50.4                |
|                          | C35—C33—C34            | C35—C33—C32            | 58.7                |
|                          | C35—C32—C33            | C35—C32—C37            | 50.2                |
| <b>4, Re1</b>            | C710—C713—C712         | C710—C713—C715         | 11.1                |
|                          | C712—C715—C710         | C712—C715—C713         | 10.2                |
|                          | C713—C714—C715         | C713—C714—C716         | 2.7                 |
|                          | C715—C716—C713         | C715—C716—C714         | 2.7                 |
|                          | C710—C716—C712         | C710—C716—C714         | 16.1                |
|                          | C712—C714—C710         | C712—C714—C716         | 14.5                |
|                          | C713—C716—C711         | C713—C716—C712         | 58.6                |
|                          | C714—C715—C710         | C714—C715—C711         | 18.1                |
| <b>4, Re2</b>            | C810—C815—C816         | C810—C815—C814         | 50.2                |
|                          | C810—C816—C815         | C810—C816—C813         | 59.3                |
|                          | C810—C812—C816         | C810—C812—C813         | 49.3                |
|                          | C810—C813—C812         | C810—C813—C814         | 57.9                |
|                          | C810—C814—C813         | C810—C814—C815         | 51.9                |
|                          | C811—C814—C815         | C811—C814—C813         | 58.4                |
|                          | C811—C815—C814         | C811—C815—C816         | 56.5                |
|                          | C811—C816—C815         | C811—C816—C812         | 46.7                |
|                          | C811—C812—C816         | C811—C812—C813         | 67.7                |
|                          | C811—C813—C812         | C811—C813—C814         | 44.7                |
| <b>5, Re01</b>           | C00W—C01K—C019         | C00W—C01K—C015         | 70.5                |
|                          | C00W—C019—C01K         | C00W—C019—C00Z         | 32.4                |
|                          | C00W—C00Z—C019         | C00W—C00Z—C020         | 72.0                |
|                          | C00W—C020—C00Z         | C00W—C020—C015         | 39.0                |
|                          | C00W—C015—C020         | C00W—C015—C01K         | 54.0                |
|                          | C01C—C01K—C019         | C01C—C01K—C015         | 46.6                |
|                          | C01C—C019—C01K         | C01C—C019—C00Z         | 70.7                |
|                          | C01C—C00Z—C019         | C01C—C00Z—C020         | 28.5                |
|                          | C01C—C020—C00Z         | C01C—C020—C015         | 66.2                |
|                          | C01C—C015—C020         | C01C—C015—C01K         | 57.0                |

<sup>a</sup> Dihedral angles for ideal polyhedral were taken from refs [44, 49]

**Table S3.** Selected bond lengths (Å) and angles (deg) for {Re(CN)<sub>7</sub>} units.

| compound | Re–C       |          | C–Re–C           |           | C–Re–C           |            |
|----------|------------|----------|------------------|-----------|------------------|------------|
| 3, Re1   | Re1--C31   | 2.099(4) | C31--Re1--C32    | 85.62(14) | C31--Re1--C35    | 175.46(15) |
|          | Re1--C32   | 2.108(4) | C31--Re1--C33    | 95.21(15) | C32--Re1--C36    | 145.46(14) |
|          | Re1--C33   | 2.105(4) | C31--Re1--C34    | 90.64(15) | C33--Re1--C36    | 143.43(14) |
|          | Re1--C34   | 2.108(4) | C31--Re1--C36    | 89.33(14) | C34--Re1--C32    | 142.67(15) |
|          | Re1--C35   | 2.102(4) | C31--Re1--C37    | 86.85(14) | C37--Re1--C33    | 143.51(14) |
|          | Re1--C36   | 2.108(4) | C33--Re1--C32    | 71.11(14) | C37--Re1--C34    | 144.20(15) |
|          | Re1--C37   | 2.101(4) | C33--Re1--C34    | 72.28(15) |                  |            |
|          |            |          | C34--Re1--C36    | 71.40(15) |                  |            |
|          |            |          | C35--Re1--C32    | 93.03(14) |                  |            |
|          |            |          | C35--Re1--C33    | 88.45(15) |                  |            |
|          |            |          | C35--Re1--C34    | 93.05(15) |                  |            |
|          |            |          | C35--Re1--C36    | 89.33(14) |                  |            |
|          |            |          | C37--Re1--C32    | 72.75(14) |                  |            |
|          |            |          | C37--Re1--C35    | 88.61(14) |                  |            |
|          |            |          | C37--Re1--C36    | 72.87(14) |                  |            |
| 4*, Re1  | Re1--C710  | 2.082(9) | C711--Re1--C713  | 86.0(3)   | C710--Re1--C711  | 129.6(3)   |
|          | Re1--C711  | 2.125(8) | C712--Re1--C710  | 71.3(3)   | C710--Re1--C713  | 125.9(3)   |
|          | Re1--C712  | 2.051(8) | C712--Re1--C713  | 78.7(3)   | C710--Re1--C716  | 127.6(2)   |
|          | Re1--C713  | 2.125(8) | C712--Re1--C716  | 78.8(2)   | C712--Re1--C711  | 159.1(3)   |
|          | Re1--C714  | 2.054(8) | C714--Re1--C710  | 72.0(3)   | C712--Re1--C714  | 110.4(3)   |
|          | Re1--C715  | 2.065(6) | C714--Re1--C711  | 81.0(3)   | C712--Re1--C715  | 113.2(2)   |
|          | Re1--C716  | 2.106(6) | C714--Re1--C716  | 79.8(2)   | C714--Re1--C713  | 162.1(2)   |
|          |            |          | C715--Re1--C710  | 72.0(3)   | C714--Re1--C715  | 108.4(2)   |
|          |            |          | C715--Re1--C711  | 77.6(2)   | C715--Re1--C716  | 160.3(2)   |
|          |            |          | C715--Re1--C713  | 80.4(2)   |                  |            |
|          |            |          | C716--Re1--C711  | 86.4(2)   |                  |            |
|          |            |          | C716--Re1--C713  | 87.2(2)   |                  |            |
| 5, Re1   | Re01--C00W | 2.00(3)  | C0W--Re01--C00Z  | 79.5(9)   | C0W--Re01--C01C  | 178.1(9)   |
|          | Re01--C00Z | 2.13(3)  | C0W--Re01--C01K  | 81.0(10)  | C01K--Re01--C00Z | 138.3(9)   |
|          | Re01--C01C | 2.05(2)  | C0W--Re01--C015  | 92.5(11)  | C15--Re01--C00Z  | 141.7(11)  |
|          | Re01--C01K | 2.11(3)  | C0W--Re01--C019  | 98.9(10)  | C19--Re01--C015  | 149.2(11)  |
|          | Re01--C015 | 2.08(3)  | C0W--Re01--C020  | 100.4(9)  | C019--Re01--C020 | 130.3(10)  |
|          | Re01--C019 | 2.05(3)  | C1C--Re01--C00Z  | 102.2(9)  | C020--Re01--C01K | 150.0(8)   |
|          | Re01--C020 | 2.11(3)  | C1C--Re01--C01K  | 97.2(9)   |                  |            |
|          |            |          | C1C--Re01--C015  | 86.4(10)  |                  |            |
|          |            |          | C1C--Re01--C019  | 81.3(9)   |                  |            |
|          |            |          | C1C--Re01--C020  | 80.9(9)   |                  |            |
|          |            |          | C15--Re01--C01K  | 75.4(11)  |                  |            |
|          |            |          | C15--Re01--C020  | 74.6(11)  |                  |            |
|          |            |          | C19--Re01--C00Z  | 68.9(9)   |                  |            |
|          |            |          | C19--Re01--C01K  | 78.3(10)  |                  |            |
|          |            |          | C020--Re01--C00Z | 70.3(9)   |                  |            |

\*Due to disorder of [Re(CN)<sub>7</sub>]<sup>3-</sup> units for Re2, bond lengths Re2–C, C–N and ‘angle distances’ Re2···N were restrained to be 2.10, 1.16 and 3.25 Å respectively with default corresponding standard deviations.

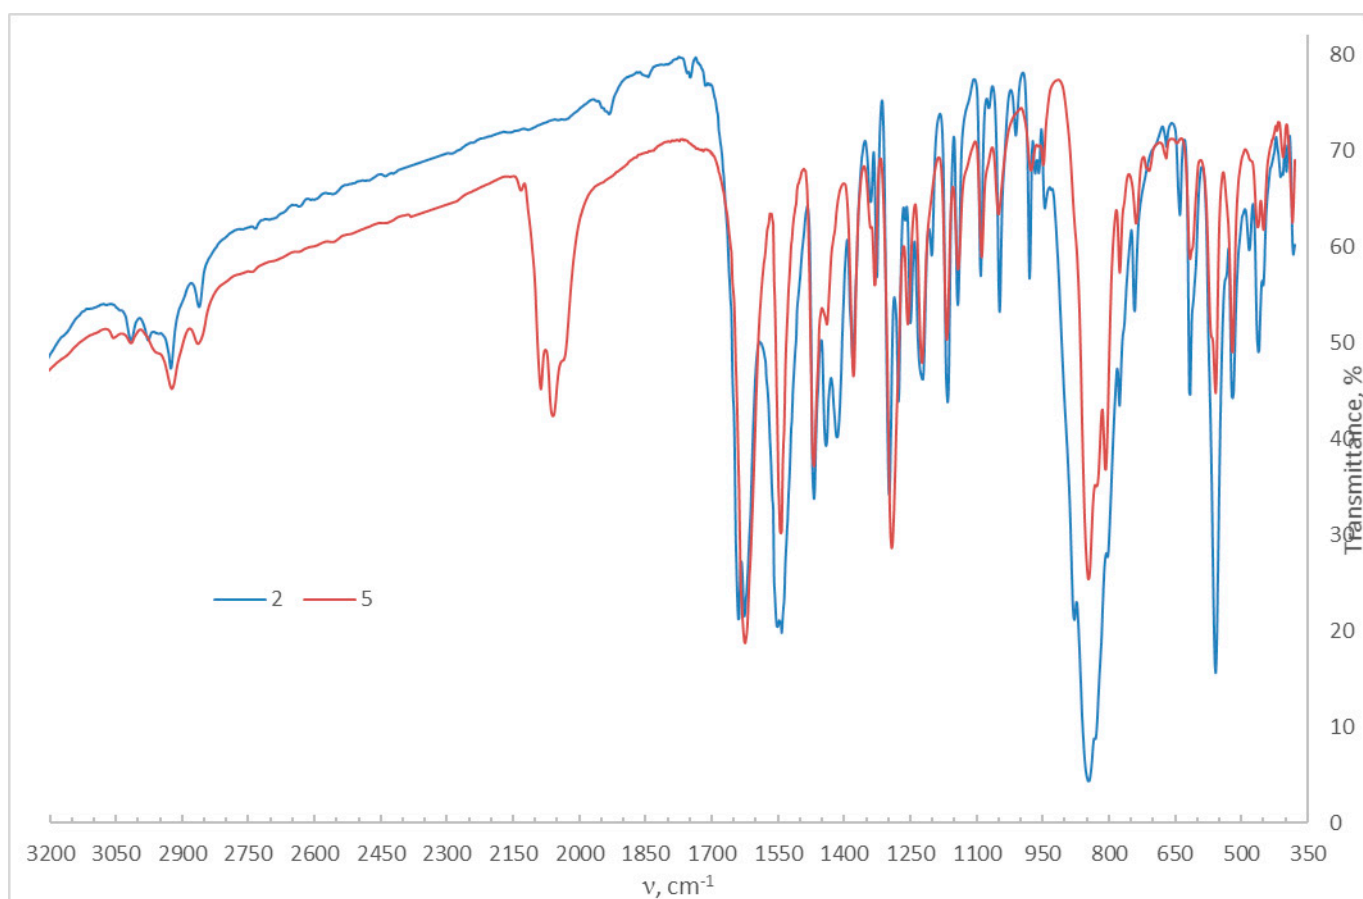

**Figure S4.** IR spectra of the compound 5 and its precursor 2 registered in KBr pellets.

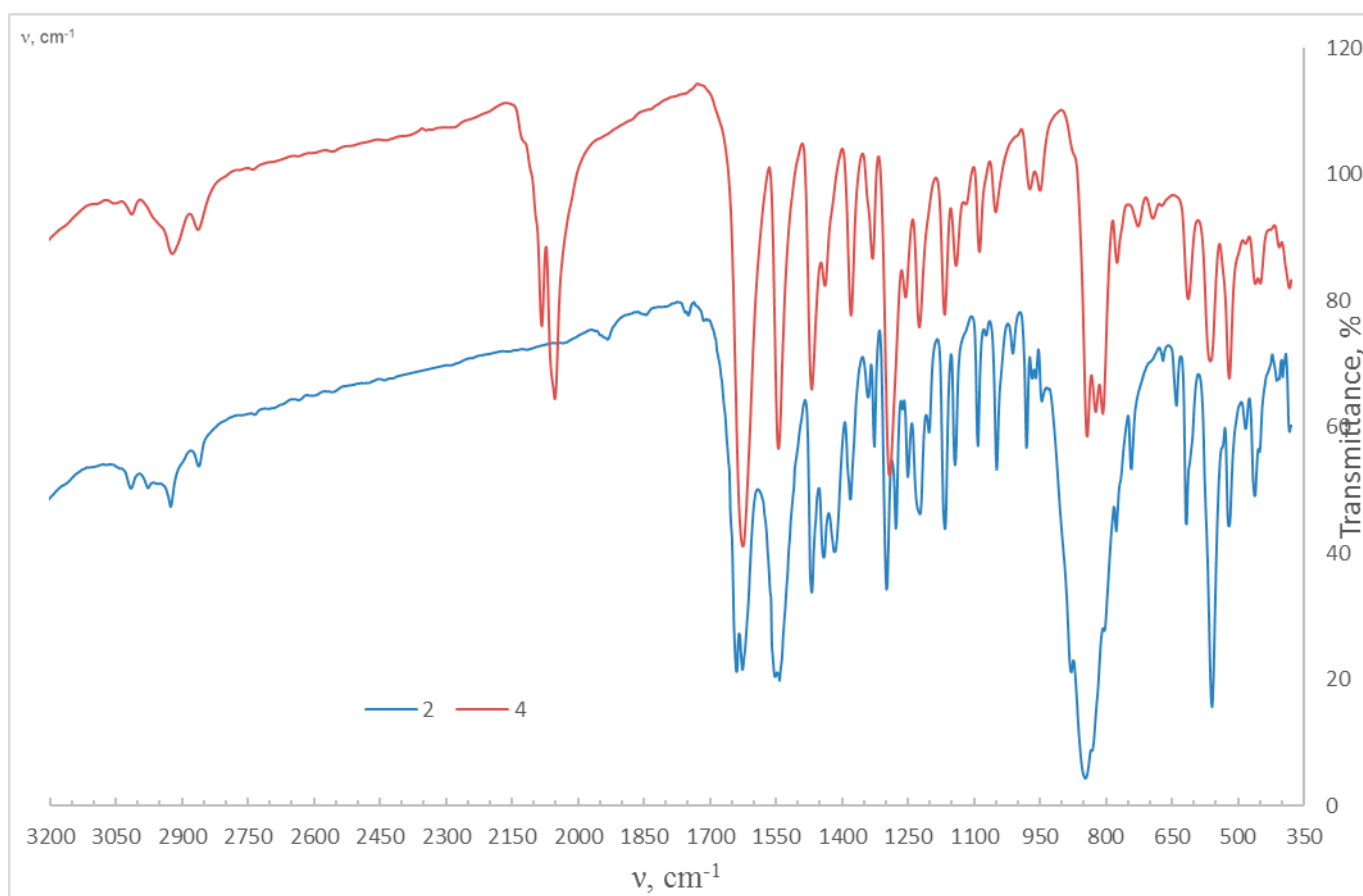



**Figure S5.** IR spectra of the compound **4** and its precursor **2** registered in KBr pellets.

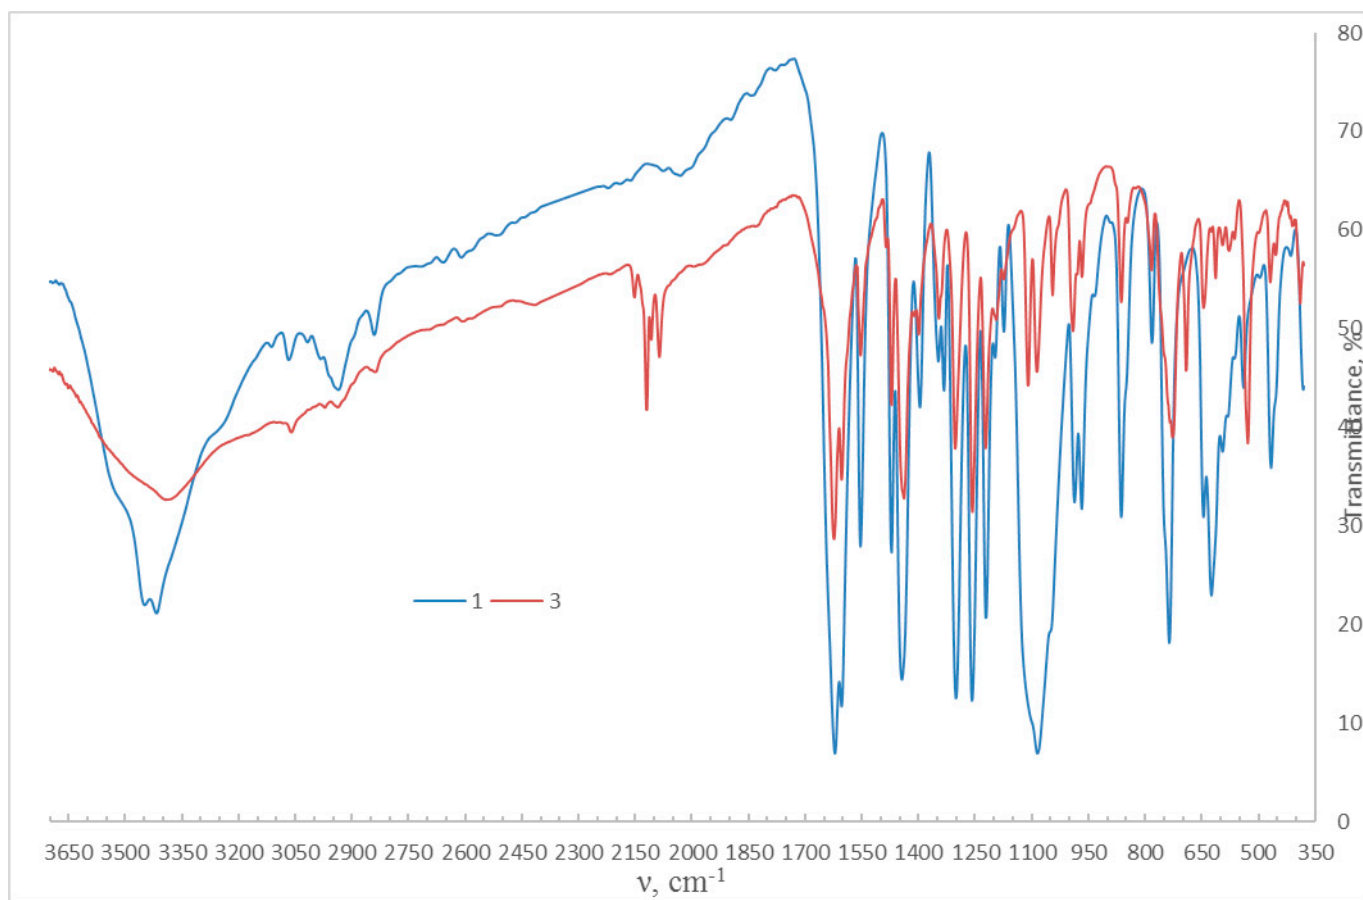

**Figure S6.** IR spectra of the compound **3** and its precursor **1** registered in KBr pellets.

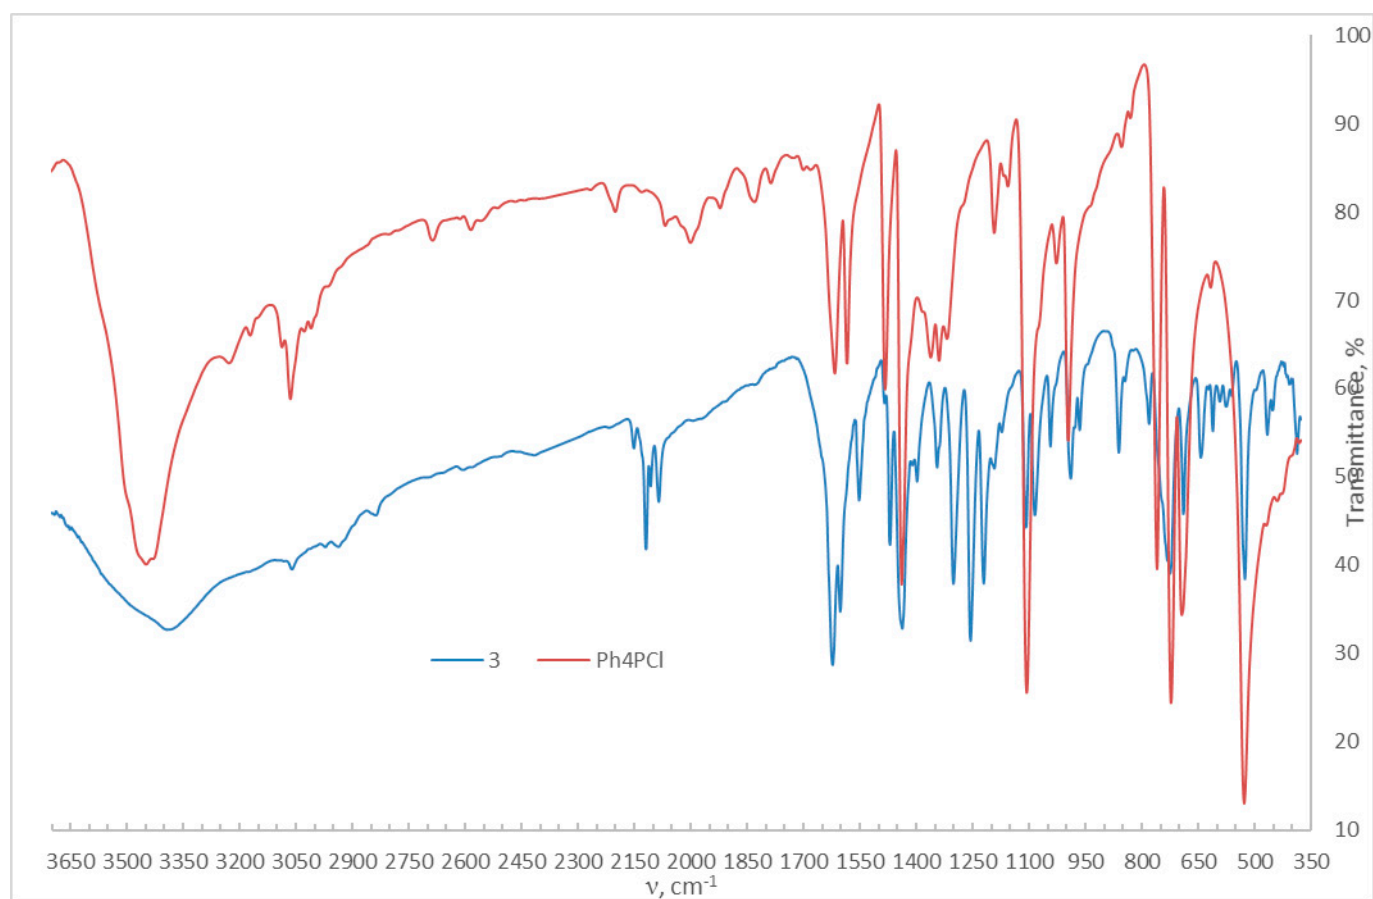

**Figure S7.** IR spectra of the compound **3** and Ph4PCl registered in KBr pellets.

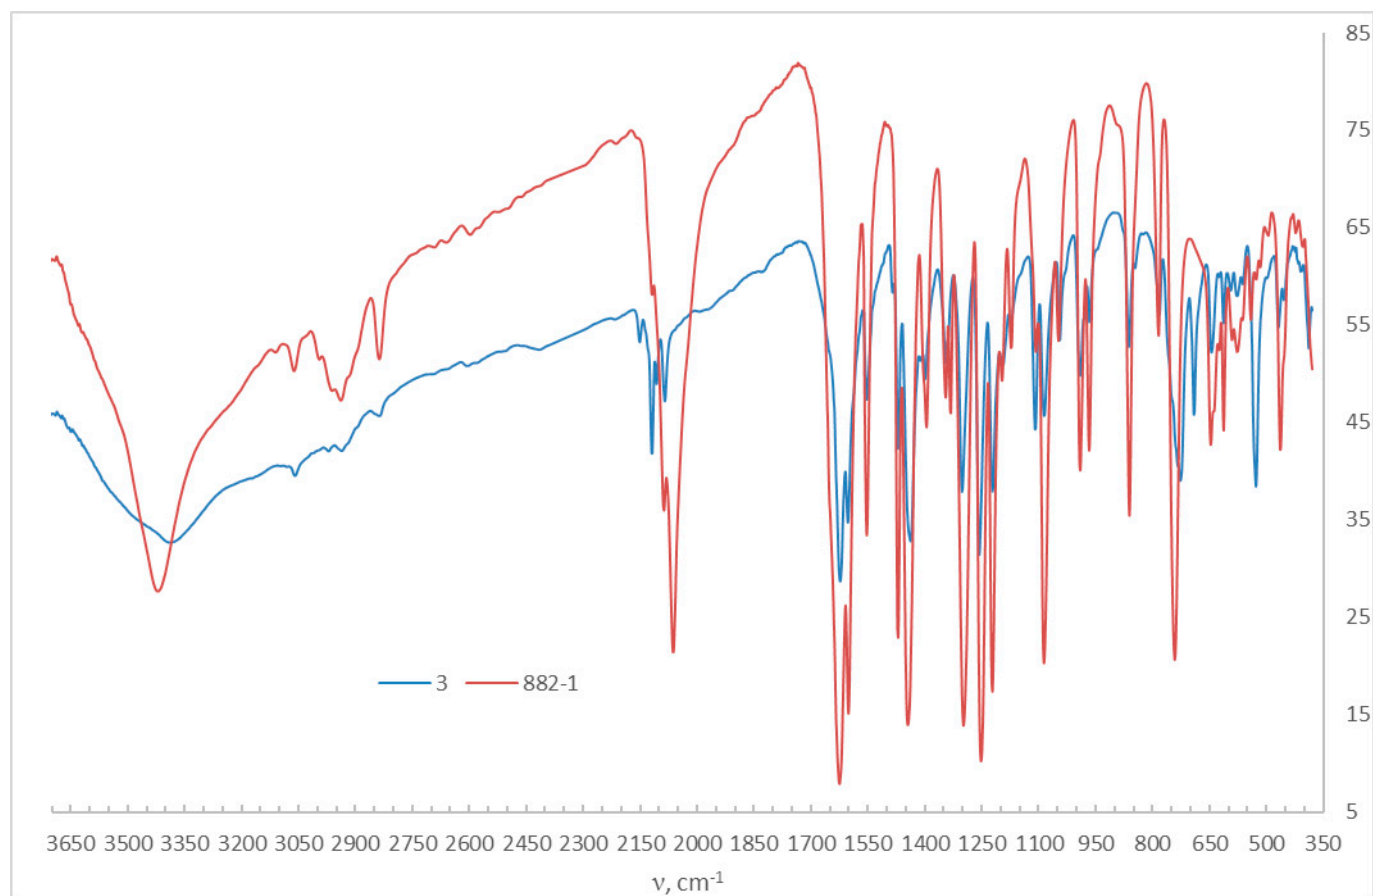

**Figure S8.** IR spectra of the compound **3** and  $[\text{Mn}^{\text{3MeOSalenH}_2\text{O}}_4\text{Re}(\text{CN})_7]\text{ClO}_4(\text{CH}_3\text{CN})_{1.5}(\text{H}_2\text{O})_{6.5}$  (**882-1**) in KBr pellets.

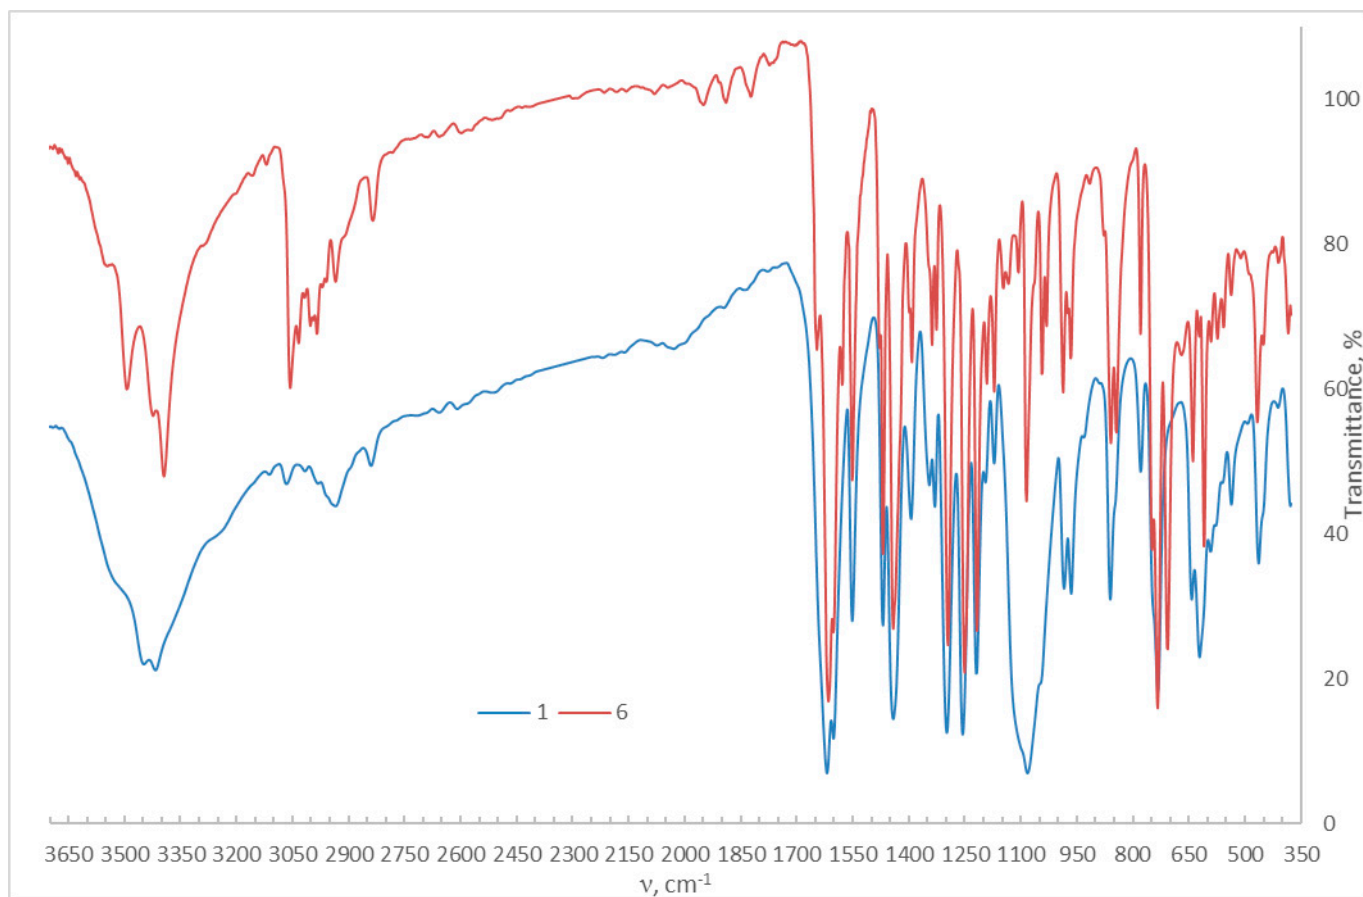

**Figure S9.** IR spectra of the compound **6** and its precursor **1** registered in KBr pellets.

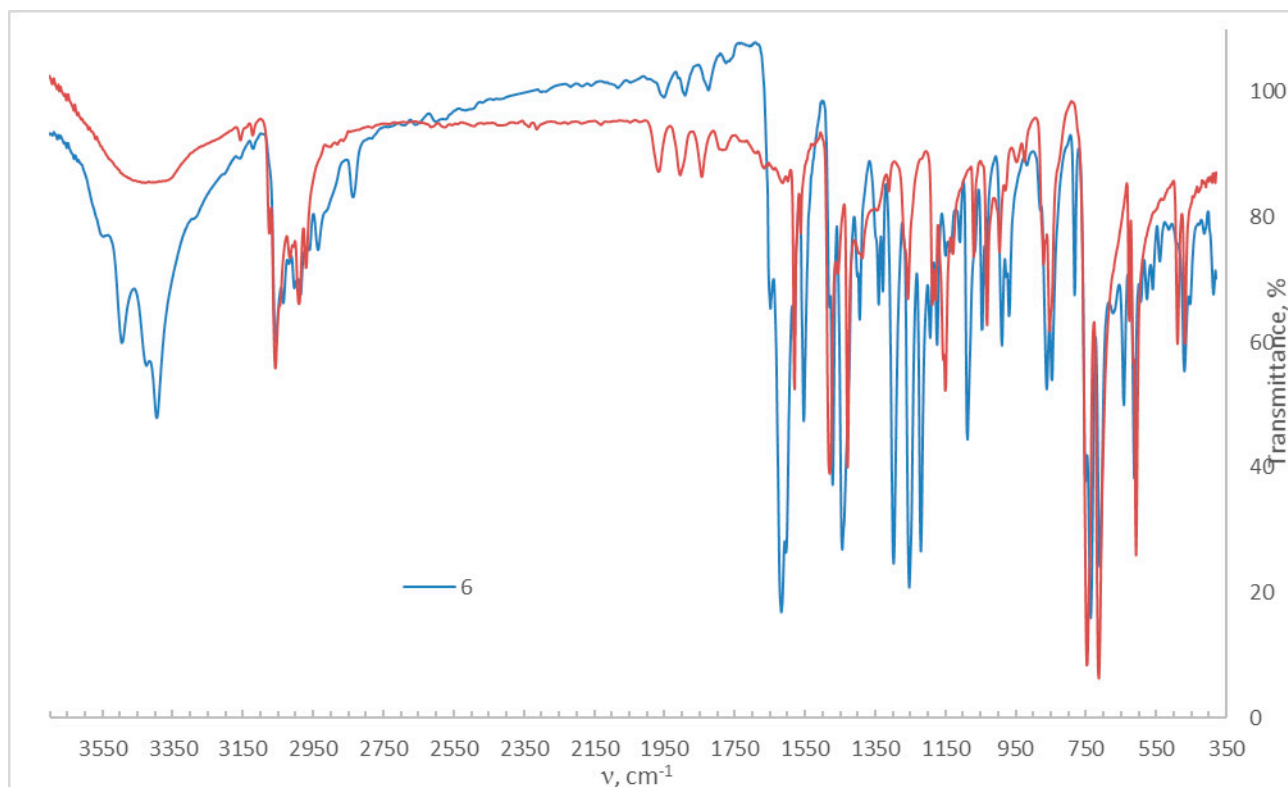

**Figure S10.** IR spectra of the compound **6** and NaPh<sub>4</sub>B registered in KBr pellets.
